# Supplementary material for: Increasing Phosphorus Digestibility in Common Carp (Cyprinus carpio L.) Farming Using Phytase and Citric Acid
Source: Hindawi journal article supplement (doi:10.1155/2023/4781600), 2023-07-26
Supplement: f1 [file 4781600.f1.docx]

***Supporting Information***

Increasing phosphorus digestibility in common carp (*Cyprinus carpio* L.) farming using phytase and citric acid

Malý Ondřej, Zugárková Iveta, Radojičić Marija, Poštulková Eva, Mareš Jan

Department of Zoology, Fisheries, Hydrobiology and Apiculture Mendel University in Brno

Zemedelska 1, 613 00 Brno CZECH REPUBLIC


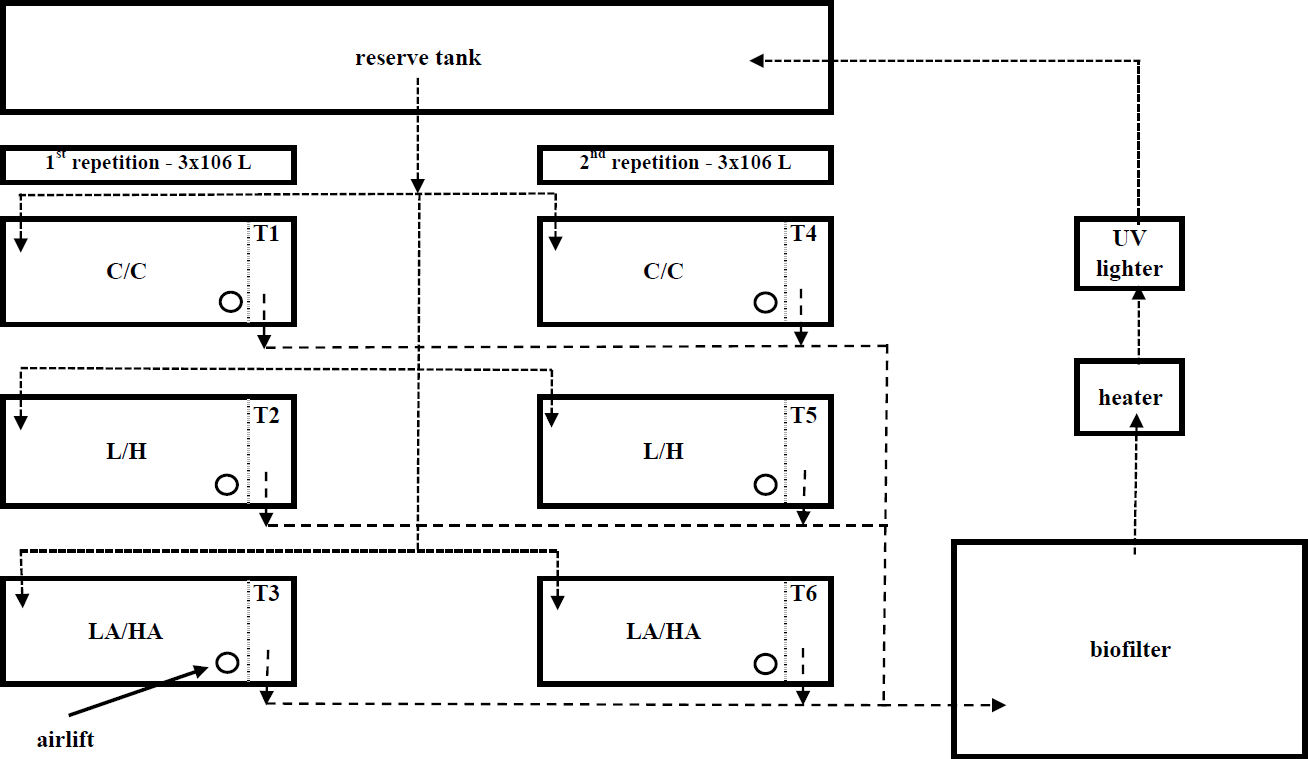


**Supporting Information Figure 1**. Scheme of the first part of the experiment and the system used.


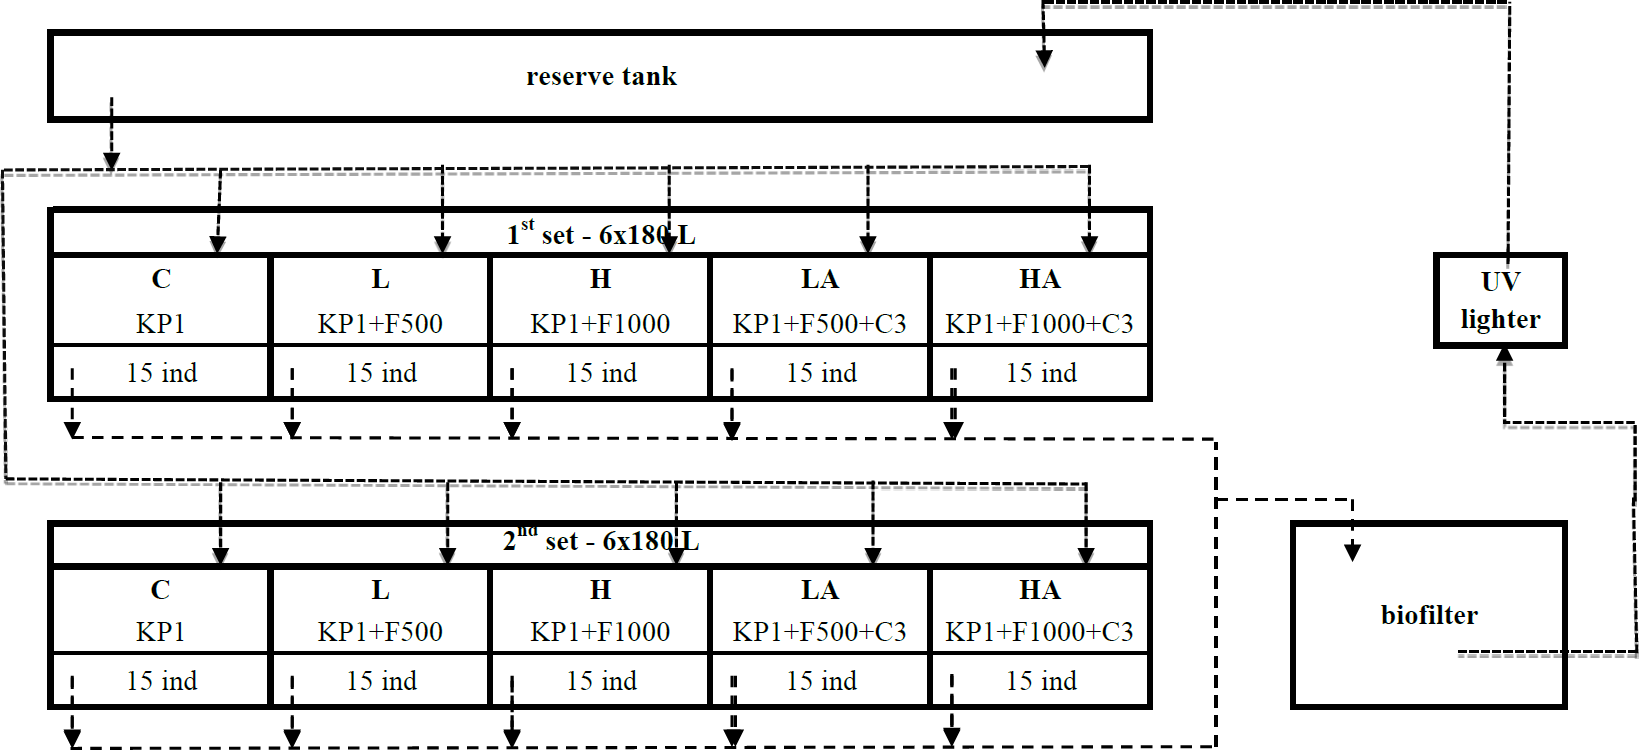


**Supporting Information Figure 2**. Scheme of the second part of the experiments and the system used.
